# Supplementary material for: Chemical vapour deposition (CVD) of nickel oxide using the novel nickel dialkylaminoalkoxide precursor [Ni(dmamp′)2] (dmamp′ = 2-dimethylamino-2-methyl-1-propanolate)
Source: Royal Society of Chemistry journal article supplement (doi:10.1039/d1ra03263a), 2021-01-01
Supplement: d1ra03263a1.pdf [file d1ra03263a1.pdf]

**Chemical vapour deposition (CVD) of nickel oxide using the novel nickel dialkylaminoalkoxide precursor [Ni(dmamp')<sub>2</sub>] (dmamp' = 2-dimethylamino-2-methyl-1-propanolate)**

*Rachel L. Wilson<sup>1</sup>, Thomas J. Macdonald<sup>1,2</sup>, Chieh-Ting Lin<sup>3</sup>, Shengda Xu<sup>3</sup>, Alaric Taylor<sup>4</sup>, Caroline E. Knapp<sup>1</sup>, Stefan Guldin<sup>4</sup>, Martyn A. McLachlan<sup>3</sup>, Claire J. Carmalt<sup>1\*</sup>, Chris S. Blackman<sup>1,5\*</sup>*

**Table S1** outlines the crystal data and structure refinement details, and **Table S2** selected bond lengths and bond angles, for [Ni(dmamp')<sub>2</sub>].

**Table S1:** Crystal data and structure refinement for [Ni(dmamp')<sub>2</sub>]

|                                      |                                                                 |
|--------------------------------------|-----------------------------------------------------------------|
| Empirical formula                    | C <sub>12</sub> H <sub>28</sub> N <sub>2</sub> NiO <sub>2</sub> |
| Formula weight                       | 291.07                                                          |
| Temperature/K                        | 150.5(7)                                                        |
| Crystal system                       | orthorhombic                                                    |
| Space group                          | Pbca                                                            |
| a/Å                                  | 7.29170(10)                                                     |
| b/Å                                  | 10.68490(10)                                                    |
| c/Å                                  | 17.7929(2)                                                      |
| α/°                                  | 90                                                              |
| β/°                                  | 90                                                              |
| γ/°                                  | 90                                                              |
| Volume/Å <sup>3</sup>                | 1386.26(3)                                                      |
| Z                                    | 4                                                               |
| ρ <sub>calc</sub> /g/cm <sup>3</sup> | 1.395                                                           |
| μ/mm <sup>-1</sup>                   | 1.965                                                           |
| F(000)                               | 632.0                                                           |
| Crystal size/mm <sup>3</sup>         | 0.141 × 0.128 × 0.064                                           |
| Radiation                            | CuKα (λ = 1.54184)                                              |
| 2θ range for data collection/°       | 15.714 to 148.974                                               |
| Index ranges                         | -8 ≤ h ≤ 9, -13 ≤ k ≤ 13, -22 ≤ l ≤ 22                          |
| Reflections collected                | 19513                                                           |
| Independent reflections              | 1410 [R <sub>int</sub> = 0.0227, R <sub>sigma</sub> = 0.0078]   |
| Data/restraints/parameters           | 1410/0/135                                                      |
| Goodness-of-fit on F <sup>2</sup>    | 1.094                                                           |
| Final R indexes [I ≥ 2σ (I)]         | R <sub>1</sub> = 0.0209, wR <sub>2</sub> = 0.0566               |
| Final R indexes [all data]           | R <sub>1</sub> = 0.0224, wR <sub>2</sub> = 0.0582               |

**Table S2:** Selected bond lengths and bond angles for compound (1) [Ni(dmamp')<sub>2</sub>] (in which <sup>1</sup>1-X,1-Y,1-Z).

| Atom - Atom                                   | Length (Å) | Atom - Atom         | Length (Å) |
|-----------------------------------------------|------------|---------------------|------------|
| Ni(1) – O(1)                                  | 1.8427(7)  | N(1) – C(1)         | 1.5239(12) |
| Ni(1) – O(1) <sup>1</sup>                     | 1.8427(7)  | N(1) – C(5)         | 1.4788(13) |
| Ni(1) – N(1) <sup>1</sup>                     | 1.9545(8)  | C(3) – C(1)         | 1.5319(14) |
| Ni(1) – N(1)                                  | 1.9546(8)  | C(4) – C(1)         | 1.5311(14) |
| O(1) – C(2)                                   | 1.3992(12) | C(1) – C(2)         | 1.5313(14) |
| N(1) – C(6)                                   | 1.4896(13) |                     |            |
| Atom – Atom - Atom                            | Angle (°)  | Atom – Atom - Atom  | Angle (°)  |
| O(1) – Ni(1) – O(1) <sup>1</sup>              | 180.00     | C(5) – N(1) – Ni(1) | 113.89(7)  |
| O(1) <sup>1</sup> – Ni(1) – N(1) <sup>1</sup> | 88.43(3)   | C(5) – N(1) – C(6)  | 106.95(8)  |
| O(1) – Ni(1) – N(1)                           | 88.43(3)   | C(5) – N(1) – C(1)  | 112.91(8)  |
| O(1) <sup>1</sup> – Ni(1) – N(1)              | 91.57(3)   | N(1) – C(1) – C(3)  | 108.98(8)  |
| O(1) – Ni(1) – N(1) <sup>1</sup>              | 91.57(3)   | N(1) – C(1) – C(4)  | 113.07(8)  |
| N(1) – Ni(1) – N(1) <sup>1</sup>              | 180.0(5)   | N(1) – C(1) – C(2)  | 104.13(8)  |
| C(2) – O(1) – Ni(1)                           | 112.10(6)  | C(3) – C(1) – C(4)  | 110.37(9)  |
| C(6) – N(1) – Ni(1)                           | 105.98(6)  | C(2) – C(1) – C(3)  | 108.84(8)  |
| C(6) – N(1) – C(1)                            | 112.61(8)  | C(2) – C(1) – C(4)  | 111.22(8)  |
| C(1) – N(1) – Ni(1)                           | 104.41(6)  | O(1) – C(2) – C(1)  | 110.15(8)  |

Film thickness was obtained from the ellipsometry measurements and showed an approximately linear relationship of increasing film thickness with deposition temperature (Table S3).

**Table S3:** Film thickness and refractive index values of NiO films deposited by CVD of [Ni(dmamp')<sub>2</sub>] at various temperatures

| Deposition time (hours) | Growth temp (°C) | Film thickness (nm) | <i>n</i> @ 632.8 nm |
|-------------------------|------------------|---------------------|---------------------|
| 24                      | 250              | 17                  | 1.5                 |

|    |     |     |     |
|----|-----|-----|-----|
| 24 | 300 | 40  | 2.3 |
| 24 | 350 | 85  | 2.6 |
| 24 | 400 | 117 | 1.8 |

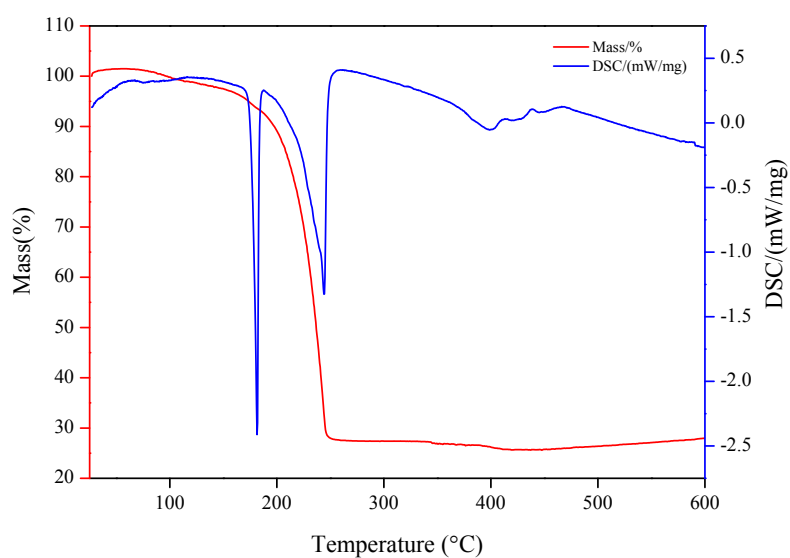

**Figure S1.** TGA/DSC curves for  $[\text{Ni}(\text{dmamp}')_2]$ .

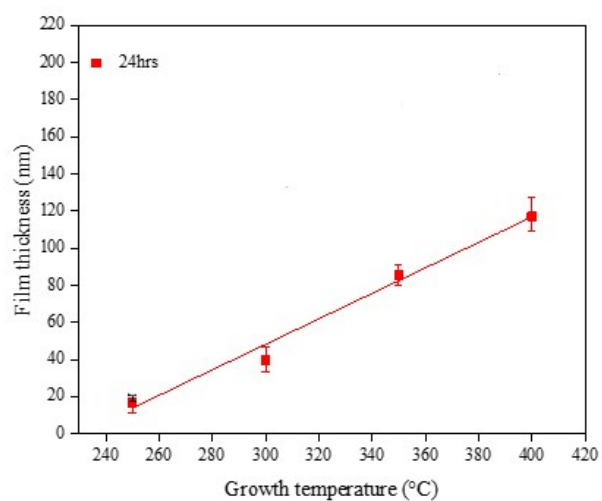

**Figure S2:** Temperature dependence on the film thickness of NiO films deposited by CVD of  $[\text{Ni}(\text{dmamp}')_2]$  grown for a given time of 24 hours.

Films deposited at a growth temperature of 400 °C appeared visually non-uniform in thickness, with the inlet end of the substrate thicker than the outlet end of the substrate. Reduction of the growth temperature from 400 °C to 300 °C resulted in visually more uniform thin films with refractive index values more consistent with literature values for NiO. As a growth temperature of 300 °C appeared to provide visually uniform films with low roughness, subsequently the relationship between deposition time and NiO film thickness was investigated at this temperature (**Figure S3**).

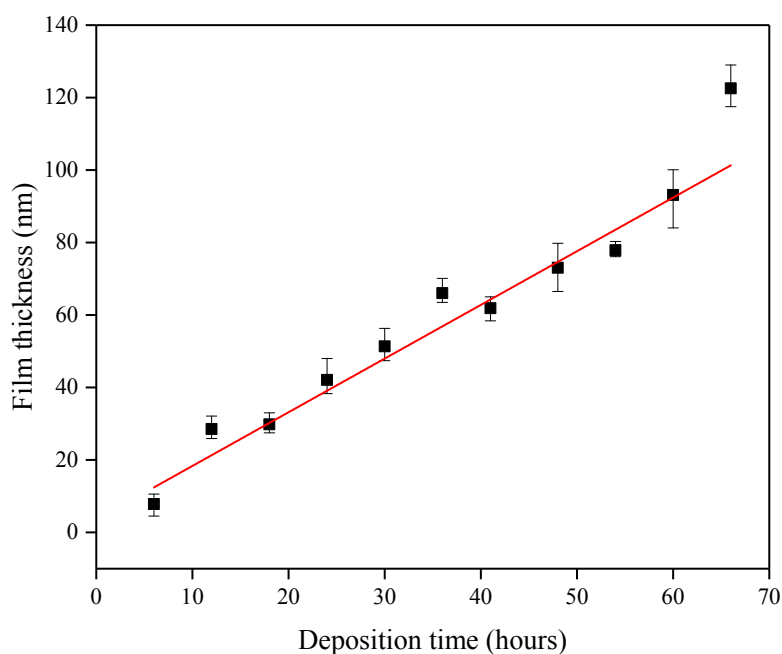

**Figure S3:** Relationship between deposition time and film thickness for NiO films deposited by CVD of  $[\text{Ni}(\text{dmamp}')_2]$  at a single growth temperature of 300 °C.

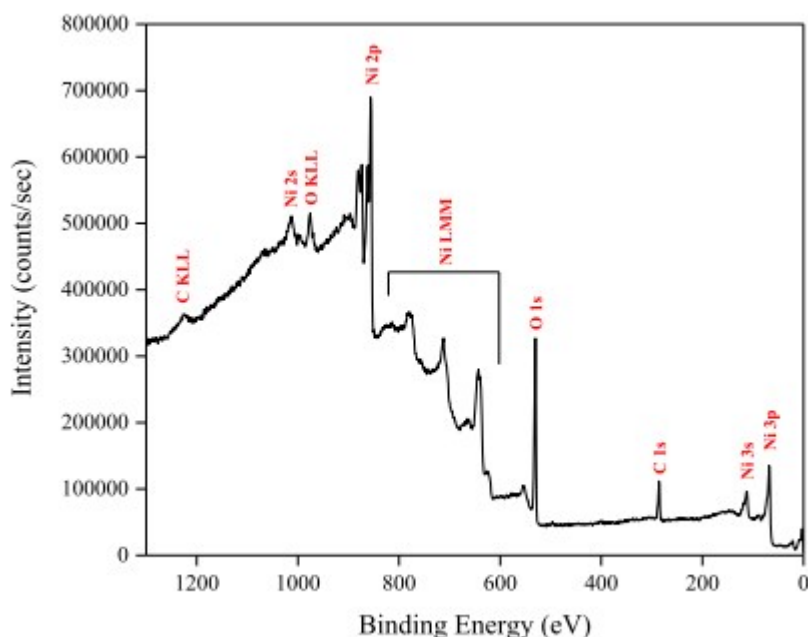

**Figure S4:** Typical XPS survey spectrum of NiO films deposited by CVD of  $[\text{Ni}(\text{dmamp}')_2]$  at a growth temperature of 300 °C.

High resolution surface scans (Figure S5a) of the Ni2p peak confirm the presence of  $\text{Ni}^{2+}$ , with  $2p_{3/2}$  and  $2p_{1/2}$  peak binding energies of 855.4 eV and 873.2 eV respectively, with a peak separation of 17.8 eV. These values are within  $\pm 0.2$  eV of literature values.<sup>[1]</sup> Characteristic satellite peaks for the  $2p_{3/2}$  and  $2p_{1/2}$  peaks were observed at  $861.8 \pm 0.2$  eV and  $880.2 \pm 0.2$  eV respectively. The prominent satellite shoulder 1.8 eV above the Ni  $2p_{3/2}$  principal peak is unique to NiO.<sup>[2]</sup>

De-convolution of the O1s peak reveals 2 peaks. The two peaks at higher binding energy,  $532.8 \pm 0.2$  eV and  $531.4 \pm 0.2$  eV can be attributed to surface bound carbon and surface adsorbed water, respectively. The peak with the lowest binding energy ( $529.6 \pm 0.2$  eV) is attributed to the O1s core peak of  $\text{O}^{2-}$  bound to  $\text{Ni}^{2+}$  (Figure S5b). Again, these peaks are consistent with literature values for these peak environments.

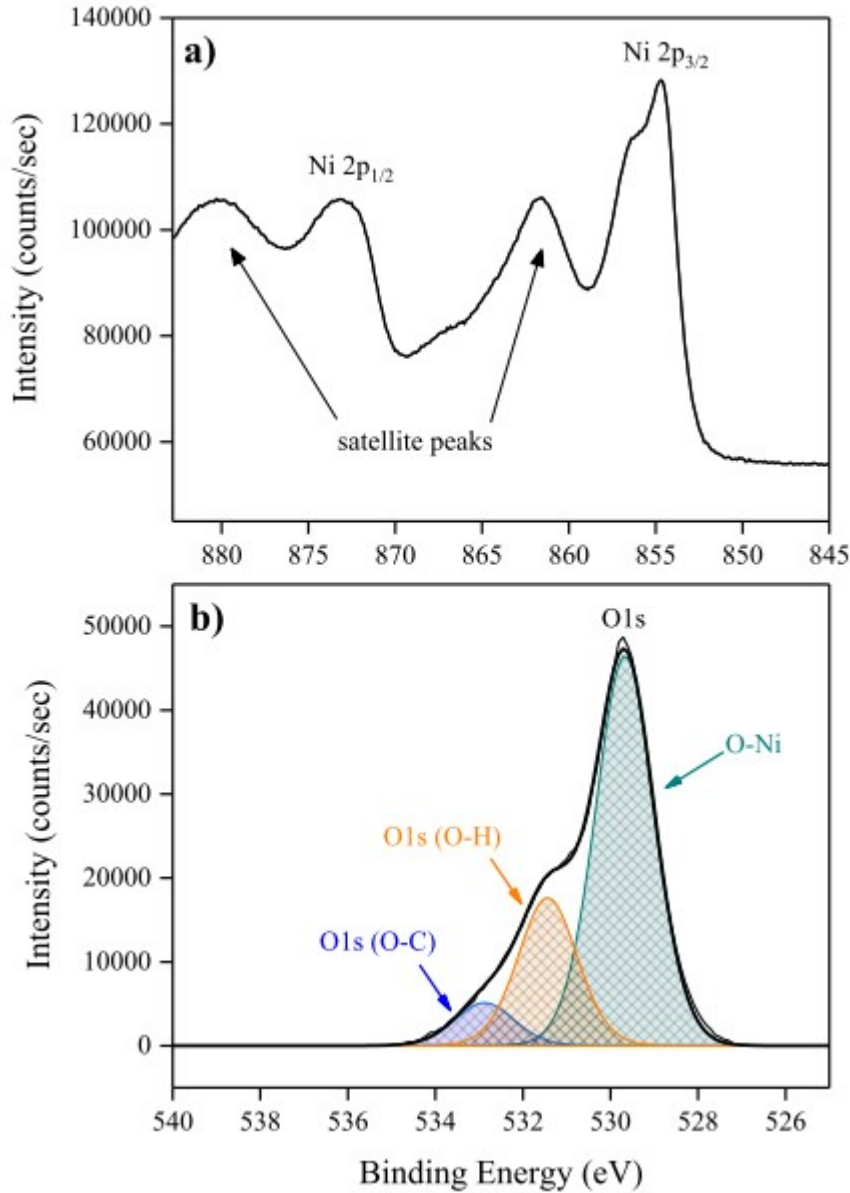

**Figure S5:** Typical high resolution surface XPS spectra of a) Ni2p peak and b) de-convoluted O1s peak for NiO films deposited by CVD of [Ni(dmamp<sup>+</sup>)<sub>2</sub>] at a growth temperature of 300 °C.

**Table S4:** photovoltaic parameters for NiO control and NiO CVD devices.

| Photoelectrode | $J_{SC}$ (mA cm <sup>-2</sup> ) | $V_{OC}$ (V)     | $FF$            | PCE (%)        |
|----------------|---------------------------------|------------------|-----------------|----------------|
| NiO Control    | 21.3 (+/- 0.1)                  | 1.04 (+/- 0.001) | 0.66 (+/- 0.05) | 14.1 (+/- 0.1) |
| NiO CVD        | 7.8 (+/- 0.5)                   | 1.02 (+/- 0.01)  | 0.50 (+/- 0.5)  | 3.9 (+/- 0.2)  |

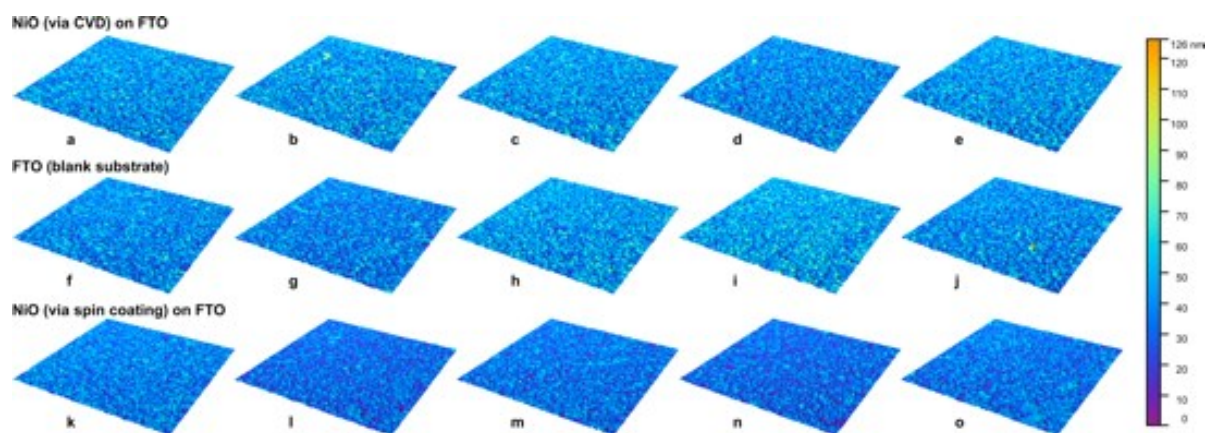

**Figure S6:** AFM images of 5x5  $\mu\text{m}$  areas over a lateral resolution of 10 nm for five duplicate samples of FTO, CVD-deposited NiO/FTO and spin-coating-deposited NiO/FTO.

**Table S5:** AFM data of 5x5  $\mu\text{m}$  areas over a lateral resolution of 10 nm for five duplicate samples of FTO, CVD-deposited NiO/FTO and spin-coating-deposited NiO/FTO.

| <b>Aggregated (Mean)</b>               |                     |                           |                               |
|----------------------------------------|---------------------|---------------------------|-------------------------------|
| <b>Sample</b>                          | <b>Z range (nm)</b> | <b>Average value (nm)</b> | <b>RMS roughness (Sq, nm)</b> |
| <b>FTO blank substrate</b>             | 97                  | 42                        | 11                            |
| <b>NiO (via CVD) on FTO</b>            | 100                 | 43                        | 12                            |
| <b>NiO (via spin.) on FTO</b>          | 73                  | 35                        | 9.7                           |
|                                        |                     |                           |                               |
| <b>Aggregated (Standard Deviation)</b> |                     |                           |                               |
| <b>Sample</b>                          | <b>Z range (nm)</b> | <b>Average value (nm)</b> | <b>RMS roughness (Sq, nm)</b> |
| <b>FTO blank substrate</b>             | 17                  | 3.4                       | 0.24                          |
| <b>NiO (via CVD) on FTO</b>            | 10                  | 1.6                       | 0.47                          |
| <b>NiO (via spin.) on FTO</b>          | 2.9                 | 2.5                       | 0.13                          |

$^1\text{H}$  NMR and  $^{13}\text{C}\{^1\text{H}\}$  NMR spectra for  $[\text{Ni}(\text{dmamp}')_2]$  are shown in Figure S7 and Figure S8 respectively. The  $^1\text{H}$  NMR spectrum shows 3 singlet proton environments at 1.19 ppm, 2.20 ppm and 2.97 ppm, corresponding to 4 methyl groups on the ligand backbone (Ha), 4 methyl groups on the nitrogen atoms (Hb) and 2 ethyl groups on the ligand backbone (Hc), respectively. The carbon NMR spectrum again shows 4 different peak environments at 19.7, 40.6, 67.9 and 75.8 ppm, which are associated to the carbon environments C1, C2, C3 and C4, respectively as shown in Figure S8.

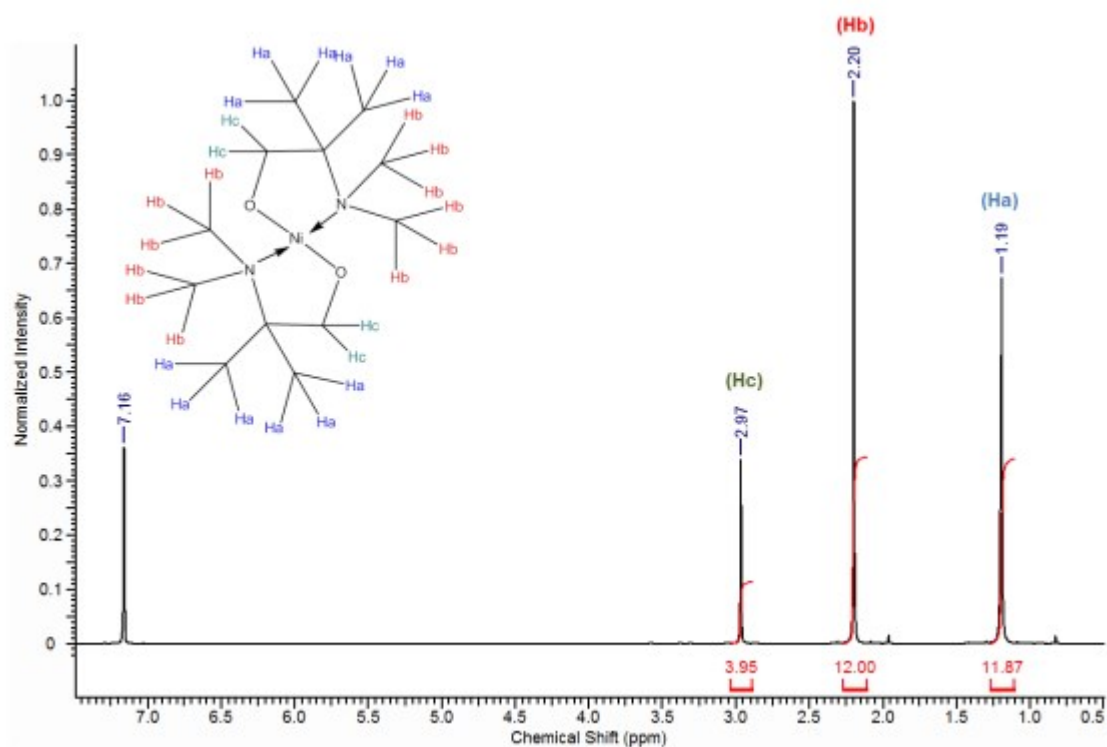

Figure S7: <sup>1</sup>H NMR spectrum of [Ni(dmamp')<sub>2</sub>]

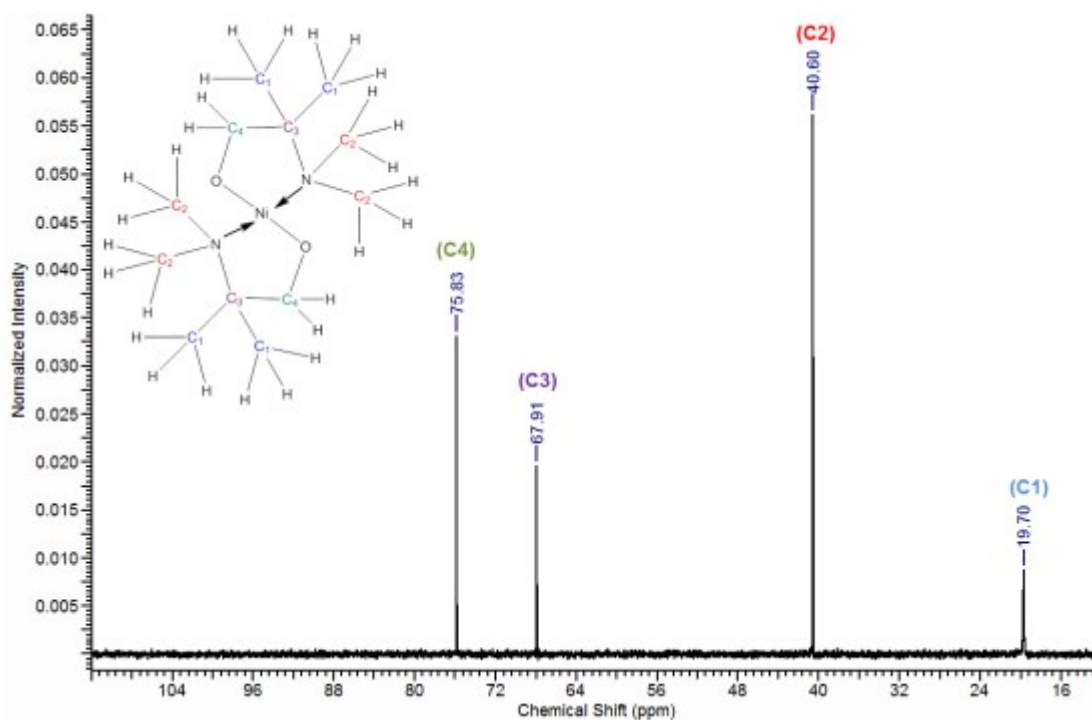

Figure S8: <sup>13</sup>C NMR spectrum of [Ni(dmamp')<sub>2</sub>]

#### References:

1. K.-C. Min, M. Kim, Y.-H. You, S. S. Lee, Y. K. Lee, T.-M. Chung, C. G. Kim, J.-H. Hwang, K.-S. An, N.-S. Lee, Y. Kim, *Surf. Coatings Technol.*, 2007, **201(22-23)**, 9252-9255.



2. N. S. McIntyre, M. G. Cook, *Anal. Chem.*, 1975, **47(13)**, 2208-2213.
